# Supplementary material for: The Syrian Health Care Scale: A Novel Instrument for Assessing Physician-Delivered Care in Crisis Contexts
Source: Research Square preprint supplement (doi:10.21203/rs.3.rs-6996415/v1), 2025-08-11
Supplement: Supplementary file 1 [file 95059bf37426f5f88d551234.docx]

| **No.** | **Statement** | **Strongly Disagree** | **Disagree** | **Partially Disagree** | **Not Decided** | **Partially Agree** | **Agree** | **Strongly Agree** |
| --- | --- | --- | --- | --- | --- | --- | --- | --- |
| 1 | A smile and a cheerful face are essential elements for treatment success. |  |  |  |  |  |  |  |
| 2 | Listening carefully to the patient is one of the most important elements in providing treatment. |  |  |  |  |  |  |  |
| 3 | Good medical equipment in clinics is essential to the quality of health care provided. |  |  |  |  |  |  |  |
| 4 | There is a close relationship between the doctor’s experience and the response to patients’ complaints* |  |  |  |  |  |  |  |
| 5 | Newly graduated doctors are more keen on the basics of health care* |  |  |  |  |  |  |  |
| 6 | Clinics with a small number of visitors daily are better than crowded clinics in applying the concept of health care to patients. |  |  |  |  |  |  |  |
| 7 | Most patients want to leave the clinic after receiving their prescriptions* |  |  |  |  |  |  |  |
| 8 | Providing patient care is an essential component of achieving successful treatment. |  |  |  |  |  |  |  |
| 9 | When taking a clinical history, I only commit to filling out a pre-written card* |  |  |  |  |  |  |  |
| 10 | Being aware of patients’ circumstances and their social lives is an interference in their personal affairs and is not beneficial to treatment* |  |  |  |  |  |  |  |
| 11 | I feel it is helpful to listen to a patient’s household problems when providing health care. |  |  |  |  |  |  |  |
| 12 | The clinical examination phase should not exceed five minutes before any clinic treatment is performed* |  |  |  |  |  |  |  |
| 13 | As a doctor, it is important for me to empathise with patients, feel their problems, and appreciate their condition in order to achieve successful treatment. |  |  |  |  |  |  |  |
| 14 | I follow a single protocol when reporting bad medical news to all patients* |  |  |  |  |  |  |  |
| 15 | Patients want reassurance about their health condition rather than information about their actual health status* |  |  |  |  |  |  |  |
| 16 | Sensitivity to a patient’s problems may complicate my healthcare delivery to patients* |  |  |  |  |  |  |  |
| 17 | Responsiveness to a patient’s specific needs may influence the quality of clinical healthcare decisions* |  |  |  |  |  |  |  |
| 18 | Patients must comply with my instructions as a doctor without asking too many questions* |  |  |  |  |  |  |  |
| 19 | I prefer for the patient to comply with my recommendations without trying to identify his own condition individually.* |  |  |  |  |  |  |  |
| 20 | I feel that a good doctor is one who provides the correct diagnosis and treatment without interfering in the affairs of individual patients* |  |  |  |  |  |  |  |

*Statements marked with an asterisk are negatively phrased and may require reverse scoring for composite scale calculation.

The statements were categorised into three dimensions:

- **Emotional Questions:** 8 items
- **Behavioural Questions:** 8 items
- **Cognitive Questions:** 4 items

Participants must be categorised into four levels of healthcare provision:

- 20–58: Severely Deficient Healthcare
- 58–90: Below Standard Healthcare
- 90–118: Moderately Effective Healthcare
- 118–140: Highly Proficient Healthcare
